# Supplementary material
Source: PubMed Central journal article supplement (PMC6125973)

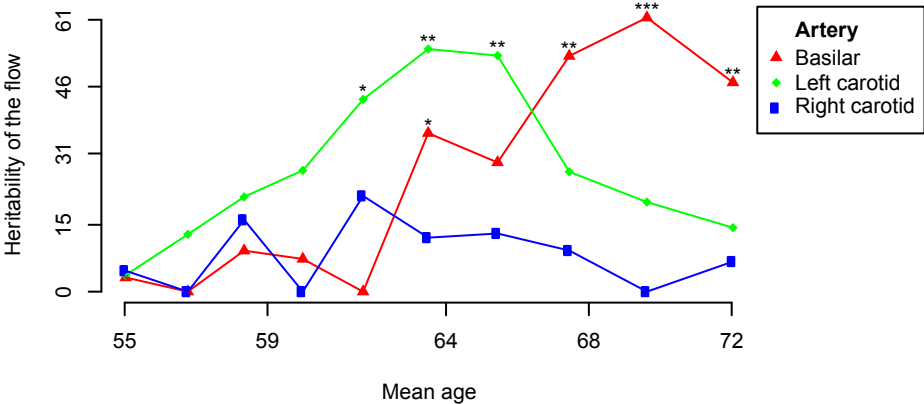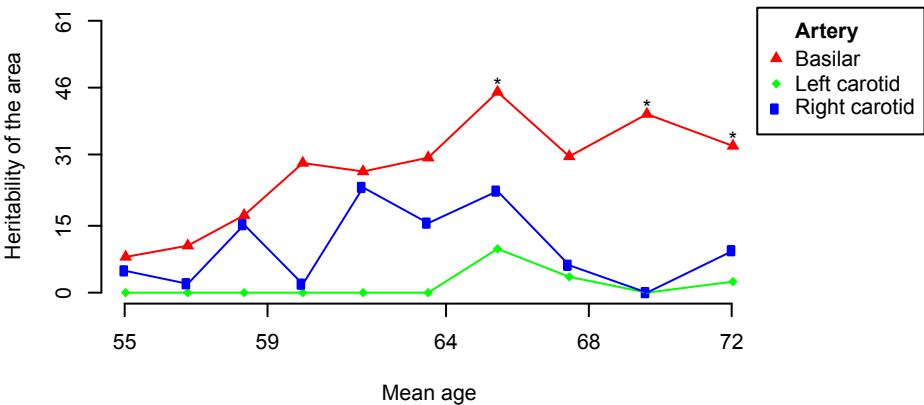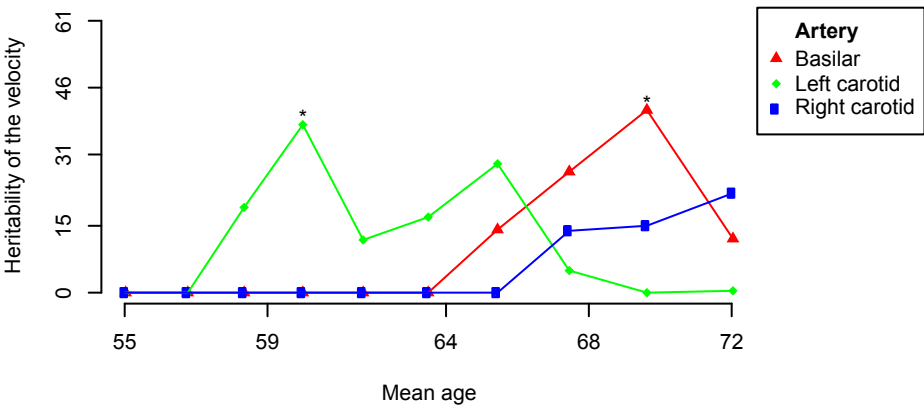

Supplement: JCB715861_supplementary_figure.pdf [file JCB715861_supplementary_figure.pdf]
